# Supplementary material
Source: publisher site journal article supplement (https://www.dovepress.com/get_supplementary_file.php?f=471127.docx)
Supplement: Supplementary file 1 [file get_supplementary_file.php]

**Supplementary Table 1** The baseline characteristics, clinical outcomes, and hematologic parameters of all AP patients and malnourished AP patients identified by Global Leadership Initiative on Malnutrition criteria (grouped by aetiology)

|  | Biliary | | | | Hypertriglyceridemic | | | | Alcoholic | | | | Other | | | |
| --- | --- | --- | --- | --- | --- | --- | --- | --- | --- | --- | --- | --- | --- | --- | --- | --- |
| Total (n = 69) | Malnourished (n = 14) | Well-nourished (n = 55) | p | Total (n = 47) | Malnourished (n = 4) | Well-nourished (n = 43) | p | Total (n = 78) | Malnourished (n = 9) | Well-nourished (n = 69) | p | Total (n = 75) | Malnourished (n = 11) | Well-nourished (n = 64) | p |
| Female, n(%) | 42(60.9) | 11(78.6) | 31(56.4) | 0.128 | 19(40.4) | 1(25.0) | 18(41.9) | 0.638 | 4(5.1) | 1(11.1) | 3(4.3) | 0.394 | 46(61.3) | 6(54.5) | 40(62.5) | 0.740 |
| Age, years | 62.0(51.0-71.0) | 71.0(64.8-86.0) | 58.0(49.2-69.0) | **<0.001** | 41.0(34.0-48.0) | 42.0(33.5-49.0) | 41.0(35.0-48.0) | 0.849 | 42.0(35.0-52.0) | 41.5(32.2-51.5) | 43.0(36.0-54.0) | 0.760 | 54.0(38.0-67.0) | 61.5(49.5-80.2) | 49.5(37.0-66.0) | 0.050 |
| AP history, n(%) | 17(24.6) | 5(35.7) | 12(21.8) | 0.309 | 18(38.3) | 2(50.0) | 16(37.2) | 0.631 | 28(35.9) | 5(55.6) | 23(33.3) | 0.270 | 13(17.3) | 3(27.3) | 10(15.6) | 0.392 |
| Overweight/obesity, n(%) | 39(56.5) | 3(21.4) | 36(65.5) | **0.003** | 39(83.0) | 3(75.0) | 36(83.7) | 0.539 | 51(65.4) | 0(0) | 51(73.9) | **<0.001** | 50(66.7) | 3(27.3) | 47(73.4) | **0.005** |
| BMI, kg/m2 | 24.91(21.67-27.34) | 19.94(17.52-23.84) | 25.32(22.82-27.64) | **0.001** | 27.04(24.49-28.09) | 25.71(24.28-26.52) | 27.02(24.49-28.09) | 0.469 | 25.95(23.00-28.48) | 18.36(17.51-19.54) | 26.23(23.66-28.73) | **<0.001** | 25.39(23.42-27.43) | 21.82(18.56-26.10) | 25.74(23.54-29.36) | **0.001** |
| Comorbidity score | 0(0-0.5) | 0(0-2.0) | 0(0-0) | 0.348 | 0(0-0) | 0(0-0) | 0(0-0) | 0.476 | 0(0-0) | 0(0-0) | 0(0-0) | 0.361 | 0(0-0) | 0(0-0) | 0(0-0) | 0.367 |
| AP classification, n(%) |  |  |  | 0.871 |  |  |  | **0.003** |  |  |  | 0.827 |  |  |  | 0.187 |
| Mild | 52(75.4) | 10(71.4) | 42(76.4) |  | 27(57.4) | 0(0) | 27(62.8) |  | 56(71.8) | 8(88.9) | 48(69.6) |  | 55(73.3) | 6(54.5) | 49(76.6) |  |
| Moderately severe | 11(15.9) | 3(21.4) | 8(14.5) |  | 13(27.7) | 1(25.0) | 12(27.9) |  | 17(21.8) | 1(11.1) | 16(23.2) |  | 14(18.7) | 4(36.4) | 10(15.6) |  |
| Severe | 6(8.7) | 1(7.1) | 5(9.1) |  | 7(14.9) | 3(75.0) | 4(9.3) |  | 5(6.4) | 0(0) | 5(7.2) |  | 6(8.0) | 1(9.1) | 5(7.8) |  |
| LOS, days | 11.0(7.5-15.0) | 11.0(6.8-14.2) | 11.0(8.0-16.5) | 0.725 | 9.0(7.0-11.0) | 16.0(12.5-17.0) | 8.5(7.0-11.0) | **0.026** | 8.0(5.0-10.0) | 9.0(7.2-9.8) | 9.0(5.0-11.0) | 0.688 | 9.0(6.0-13.0) | 6.0(2.2-15.5) | 10.0(7.0-13.0) | 0.669 |
| Hospitalization costs, CNY | 14358.33(8143.47-27264.15) | 11173.98(9739.56-24951.82) | 14725.62(8111.48-29015.47) | 0.964 | 8313.30(6332.45-13644.91) | 118134.90(63365.15-131392.05) | 8255.20(6229.76-12851.45) | **0.024** | 7970.42(5674.65-11068.97) | 12064.34(6805.04-14434.01) | 7977.37(5805.39-10364.13) | 0.052 | 9485.35(6839.81-13418.37) | 11332.76(3754.10-19906.75) | 9504.98(7316.16-14141.66) | 0.675 |
| Infectious complications, n(%) | 7(10.1) | 2(14.3) | 5(9.1) | 0.624 | 4(8.5) | 3(75.0) | 1(2.3) | **0.001** | 5(6.4) | 0(0) | 5(7.2) | 1 | 2(2.7) | 0(0) | 2(3.1) | 1 |
| Local complications, n(%) | 11(15.9) | 4(28.6) | 7(12.7) | 0.215 | 12(25.5) | 4(100.0) | 8(18.6) | **0.003** | 13(16.7) | 1(11.1) | 12(17.4) | 1 | 11(14.7) | 4(36.4) | 7(10.9) | 0.050 |
| Organ failure, n(%) | 10(14.5) | 2(14.3) | 8(14.5) | 1 | 10(21.3) | 3(75.0) | 7(16.3) | **0.026** | 13(16.7) | 0(0) | 13(18.8) | 0.342 | 12(16.0) | 3(27.3) | 9(14.1) | 0.368 |
| Systemic complications, n(%) | 7(10.1) | 1(7.1) | 6(10.9) | 1 | 7(14.9) | 3(75.0) | 4(9.3) | **0.008** | 5(6.4) | 0(0) | 5(7.2) | 1 | 6(8.0) | 1(9.1) | 5(7.8) | 1 |
| Composite adverse outcome, n(%) | 17(24.6) | 4(28.6) | 13(23.6) | 0.734 | 19(40.4) | 4(100.0) | 15(34.9) | **0.022** | 22(28.2) | 1(11.1) | 21(30.4) | 0.432 | 20(26.7) | 5(45.5) | 15(23.4) | 0.150 |
| CRP, mg/L | 30.75(2.95-105.65) | 4.32(0.50-154.04) | 36.92(3.90-102.80) | 0.299 | 82.50(19.60-143.88) | 129.79(93.18-158.58) | 62.79(18.79-138.76) | 0.079 | 82.30(15.83-153.12) | 19.04(4.43-123.07) | 71.44(16.52-163.37) | 0.315 | 79.26(16.23-146.37) | 80.16(5.22-264.58) | 81.52(15.86-149.67) | 0.504 |
| Hemoglobin, g/L | 141.0(130.0-155.0) | 129.0(113.0-140.0) | 143.0(133.2-156.0) | **0.014** | 165.0(148.0-172.0) | 145.0(129.0-155.5) | 165.5(152.0-172.0) | **0.034** | 157.5(144.8-171.0) | 152.5(142.8-163.5) | 156.0(141.0-173.0) | 0.205 | 143.5(125.0-159.2) | 128.5(104.5-163.8) | 146.0(127.0-161.2) | 0.146 |
| Neutrophil count, ×109/L | 8.76(6.40-11.73) | 6.94(5.92-10.04) | 9.63(6.94-12.28) | 0.184 | 10.75(8.77-13.78) | 9.13(5.28-13.36) | 10.92(9.36-13.78) | 0.195 | 9.70(7.06-12.95) | 7.60(5.85-9.52) | 9.69(7.11-13.35) | **0.038** | 9.56(6.54-12.16) | 6.14(5.16-8.96) | 10.30(7.08-12.54) | **0.026** |
| Lymphocyte count, ×109/L | 0.87(0.66-1.48) | 0.78(0.68-1.14) | 0.88(0.63-1.50) | 0.601 | 1.61(1.08-2.31) | 1.16(1.02-2.16) | 1.68(1.09-2.31) | 0.303 | 1.34(0.95-2.03) | 1.00(0.89-1.23) | 1.38(0.91-2.08) | **0.025** | 1.22(0.75-1.89) | 1.44(1.13-1.89) | 1.20(0.70-1.90) | 0.477 |
| Albumin, g/L | 42.20(36.65-44.55) | 37.66(35.42-43.93) | 42.34(37.56-44.50) | 0.081 | 43.45(37.62-45.16) | 27.16(26.53-36.03) | 43.45(37.95-45.16) | **0.030** | 42.84(38.68-45.40) | 42.16(37.95-48.00) | 42.37(38.52-45.80) | 0.713 | 40.51(36.17-44.14) | 37.03(34.55-45.22) | 40.71(36.12-44.40) | 0.114 |
| Blood glucose, mmol/L | 7.78(6.26-10.29) | 7.64(5.87-10.16) | 7.85(6.64-10.31) | 0.633 | 11.55(8.55-15.64) | 11.55(8.98-13.20) | 11.45(8.63-15.64) | 0.703 | 7.33(6.15-9.40) | 7.03(5.63-9.28) | 7.34(6.16-9.90) | 0.524 | 7.87(6.04-9.29) | 6.41(5.18-9.38) | 7.99(6.56-9.28) | 0.316 |
| Total cholesterol, mmol/L | 4.30(3.61-4.74) | 4.34(3.67-4.54) | 4.38(3.59-4.92) | 0.495 | 7.66(6.87-11.25) | 6.25(6.18-6.56) | 7.93(7.01-11.69) | 0.052 | 4.89(3.68-5.91) | 3.78(3.15-6.79) | 4.95(3.81-5.91) | 0.424 | 4.68(3.73-5.52) | 3.74(2.81-4.92) | 4.51(3.79-5.61) | **0.028** |
| Triglycerides, mmol/L | 1.165(0.91-1.7175) | 1.05(0.925-1.1725) | 1.235(0.895-1.9525) | 0.143 | 18.27(14.20-29.64) | 13.92(13.04-14.06) | 19.94(14.55-29.98) | **0.036** | 4.02(1.74-5.93) | 1.29(0.96-4.49) | 4.62(1.98-5.93) | 0.057 | 1.93(1.19-3.69) | 1.86(0.48-2.03) | 2.01(1.19-3.71) | 0.110 |
| CsCa, mmol/L | 2.22(2.17-2.27) | 2.21(2.11-2.23) | 2.23(2.18-2.27) | 0.156 | 2.08(1.98-2.18) | 2.04(1.98-2.12) | 2.08(1.99-2.18) | 0.269 | 2.18(2.12-2.24) | 2.24(2.04-2.27) | 2.18(2.12-2.24) | 0.221 | 2.22(2.12-2.26) | 2.22(2.18-2.28) | 2.22(2.12-2.26) | 0.141 |
| Creatinine, μmol/L | 62.90(50.70-82.86) | 59.25(53.08-87.08) | 63.95(50.10-82.49) | 0.760 | 51.30(40.70-65.20) | 94.80(80.00-193.55) | 49.30(40.50-58.10) | **0.003** | 63.75(53.55-79.80) | 60.40(47.98-64.75) | 66.70(54.57-80.70) | 0.257 | 57.20(46.00-75.80) | 60.70(41.60-74.08) | 56.90(45.88-76.08) | 0.970 |
| Urea nitrogen, mmol/L | 5.70(4.38-7.27) | 6.26(4.44-8.59) | 5.56(4.36-6.93) | 0.412 | 4.65(3.78-5.71) | 9.41(6.36-9.72) | 4.63(3.78-5.51) | 0.073 | 4.66(3.85-6.64) | 3.74(2.84-8.76) | 4.75(4.17-6.37) | 0.595 | 4.98(3.93-6.55) | 5.92(3.40-7.63) | 4.74(3.86-6.16) | 0.703 |
| Amylase, U/L | 1072.40(443.40-2313.10) | 773.60(345.32-1567.85) | 1128.10(577.22-2355.20) | 0.205 | 243.75(132.125-468.35) | 394.30(281.65-488.15) | 243.75(131.60-466.00) | 0.386 | 173.90(94.35-482.65) | 423.65(344.45-605.02) | 166.70(93.00-466.00) | 0.158 | 312.00(102.00-811.80) | 180.30(90.98-386.78) | 310.75(99.38-790.50) | 0.549 |
| Lipase, U/L | 4606.40(1684.61-6606.88) | 2985.64(459.94-5266.38) | 4975.50(2195.44-7604.58) | **0.027** | 1505.39(538.00-3169.98) | 1493.81(1011.24-2132.40) | 1557.22(538.67-3364.64) | 0.876 | 1212.93(416.96-2482.56) | 2149.54(1260.21-2696.24) | 1051.00(366.53-2758.08) | 0.295 | 1393.78(316.80-3366.00) | 470.48(105.67-2022.99) | 908.52(312.94-3515.44) | 0.373 |

**Note:** P<0.05 is highlighted in bold.

**Abbreviations:** AP, acute pancreatitis; BMI, body mass index; CNY, Chinese Yuan; CRP, C-reactive protein; CsCa, corrected serum calcium; LOS, length of stay.
